# Supplementary material for: Sodium Citrate Alleviates Virulence in Pseudomonas aeruginosa
Source: MDPI journal article supplement (doi:10.3390/microorganisms10051046), 2022-05-18
Supplement: s1 [file s1]

**Table S1.** The mean absorbances of pyocyanin in citrate treated and untreated culture supernatants at 691 nm.

| Control PAO1 | Citrate 4% | Citrate 5% |
|--------------|------------|------------|
| 0.313        | 0.071      | 0.064      |
| 0.326        | 0.067      | 0.054      |
| 0.315        | 0.067      | 0.059      |

**Table S2.** The mean absorbances of biofilm cells in citrate treated and untreated culture supernatants at 590 nm.

| Control PAO1 | Citrate 4% | Citrate 5% |
|--------------|------------|------------|
| 2.103        | 0.554      | 0.487      |
| 2090         | 0.525      | 0.505      |
| 2.133        | 0.525      | 0.525      |

**Table S3.** Fold expression of QS-encoding genes in the presence or absence of 5% citrate

| Gene        | Untreated POA1 |      |      | Citrate-treated PAO1 |       |       |
|-------------|----------------|------|------|----------------------|-------|-------|
|             |                |      |      |                      |       |       |
| <i>rhII</i> | 0.41           | 0.45 | 0.43 | -2.90                | -3.22 | -2.94 |
| <i>rhIR</i> | 0.12           | 0.25 | 0.24 | -3.50                | -3.80 | -3.75 |
| <i>lasI</i> | 0.32           | 0.40 | 0.39 | -4.53                | 4.87  | -4.62 |
| <i>lasR</i> | 0.50           | 0.63 | 0.61 | -3.90                | -4.52 | -4.40 |
| <i>pqsA</i> | 0.62           | 0.70 | 0.65 | -2.61                | -2.80 | -2.65 |
| <i>pqsR</i> | 0.35           | 0.45 | 0.46 | -4.01                | -4.40 | -4.23 |

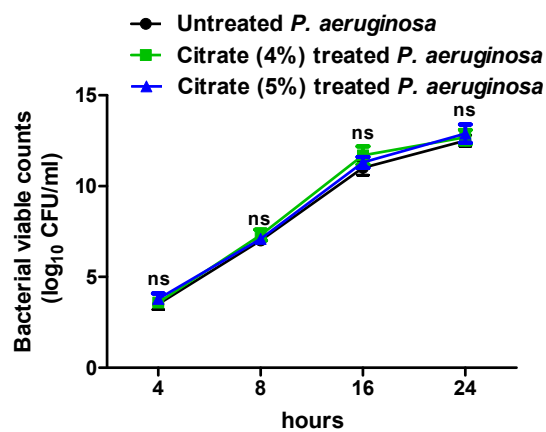

**Figure S1.** Viable count of the bacterial cells in the presence or absence of citrate after several time intervals. There was no significant effect of sodium citrate on bacterial growth.
